# Supplementary material for: Delayed and Interrupted Ventilation with Excess Suctioning after Helping Babies Breathe with Congolese Birth Attendants
Source: MDPI journal article supplement (doi:10.3390/children10040652), 2023-03-30
Supplement: s1 [file s1]

**Supplemental Table S1.** Definitions for key actions and additional notes

| Action              | Definition                                                                                                                                | Additional Notes                                                                                                           |
|---------------------|-------------------------------------------------------------------------------------------------------------------------------------------|----------------------------------------------------------------------------------------------------------------------------|
| Skin-to-skin        | Direct contact of the newborn with the mother's abdomen or chest                                                                          | If a blanket was between the newborn and the mother, this was not counted as skin-to-skin                                  |
| Dry/stimulate       | Wiping the newborn with a blanket or towel, or prompting the newborn to breathe by such actions as rubbing the back or flicking the foot  | Logged for any occurrence of either drying or stimulation                                                                  |
| Suction             | Using a suction bulb or suction catheter to remove secretions from the mouth or nose                                                      | Start time of suctioning was when bulb or catheter entered the mouth or nose                                               |
| Ventilate           | Delivering breaths to a newborn via a bag and mask                                                                                        | Start time of ventilation was when first breath was delivered (i.e., not the timing of the mask being applied to the face) |
| Cord clamp          | When the provider uses a clamp or tie to stop blood flow through the cord                                                                 | This was not the time of the cord being cut                                                                                |
| Improve ventilation | One or more of the following actions: reapplying the mask, repositioning the head, opening the mouth slightly or squeezing the bag harder | Logged all episodes of clearing the mouth or nose of secretions as 'suctioning' rather than 'improve ventilation'          |

**Supplemental Table S2.** Order of resuscitation practices by breathing status at 30 s after birth

| Order of Resuscitation Care Practices | Breathing well by 30 s after Birth<br><i>n</i> = 1818           |                         | Not Breathing well by 30 s after Birth<br><i>n</i> = 774        |                         |
|---------------------------------------|-----------------------------------------------------------------|-------------------------|-----------------------------------------------------------------|-------------------------|
|                                       | Resuscitations during which both actions occurred, <i>n</i> (%) | Frequency, <i>n</i> (%) | Resuscitations during which both actions occurred, <i>n</i> (%) | Frequency, <i>n</i> (%) |
| <i>Skin-to-skin before</i>            |                                                                 |                         |                                                                 |                         |
| Dry/stim                              | 1633 (89.8)                                                     | 1125 (68.9)             | 681 (88.0)                                                      | 450 (66.1)              |
| Suction                               | 911 (50.1)                                                      | 901 (98.9)              | 530 (68.5)                                                      | 509 (96.0)              |
| Ventilation                           | 7 (0.4)                                                         | 7 (100)                 | 44 (5.7)                                                        | 44 (100)                |
| Cord clamp                            | 1605 (88.3)                                                     | 1597 (99.5)             | 660 (85.3)                                                      | 656 (99.4)              |
| <i>Dry/stim before</i>                |                                                                 |                         |                                                                 |                         |
| Suction                               | 1029 (56.6)                                                     | 1017 (98.8)             | 608 (78.6)                                                      | 590 (97.0)              |
| Ventilation                           | 8 (0.4)                                                         | 8 (100)                 | 73 (9.4)                                                        | 73 (100)                |
| Cord clamp                            | 1783 (98.1)                                                     | 1760 (98.7)             | 751 (97.0)                                                      | 733 (97.6)              |
| <i>Suction before</i>                 |                                                                 |                         |                                                                 |                         |
| Ventilation                           | 8 (0.4)                                                         | 8 (100)                 | 73 (9.4)                                                        | 73 (100)                |
| Cord clamp                            | 1010 (55.6)                                                     | 494 (48.9)              | 589 (76.1)                                                      | 400 (67.9)              |
| <i>Cord clamp before</i>              |                                                                 |                         |                                                                 |                         |
| Ventilation                           | 8 (0.4)                                                         | 8 (100)                 | 69 (8.9)                                                        | 69 (100)                |
